# Supplementary material
Source: PubMed Central journal article supplement (PMC4985928)
Supplement: MCB.00195-16_zmb999101289so1.pdf [file MCB.00195-16_zmb999101289so1.pdf]

## Supplemental Information

### Figures

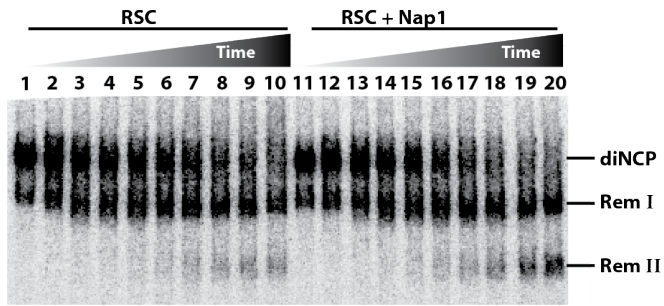

Figure S1. The extent of dinucleosomes disassembled were tracked by gel shift assays and reactions contained 20 nM 601-603 dinucleosomes, 20 nM RSC, and in lanes 11-20 300 nM Nap1. Reactions were stopped as described and ranged from 5 s to 20 min.

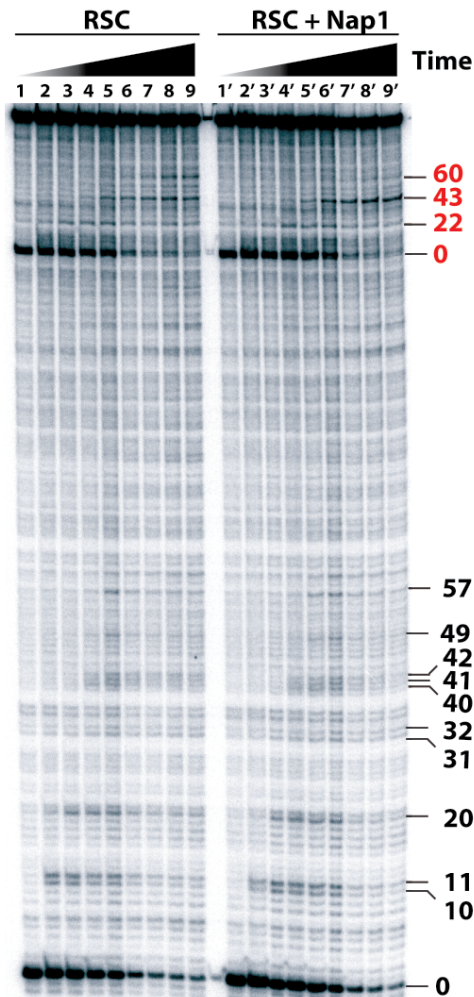

Figure S2. Nap1 changes the displacement of nucleosomes by RSC in a dinucleosome. DNA movement inside of dinucleosome was monitored from the H2A-H2B dimer interface and residue 53 of histone H2B was modified for tracking changes in DNA contacts. DNA cleavage due to the histone modification was followed on a denaturing 6% polyacrylamide gel and visualized by phosphorimaging as shown. Nucleosomes were remodeled with RSC in the absence (lanes 1-9) and presence of Nap1 (lanes 1'-9') for specified times (0, 5, 10, 20, 40, 80, 160, 300 and 600 s). Numbers on the right side of the gel image refer to number of nucleotides (nt) moved from the starting cleavage position (0) due to remodeling for N1 (black) and N2 (red) nucleosome.

Unknown

Formatted: Font:(Default) Times New Roman

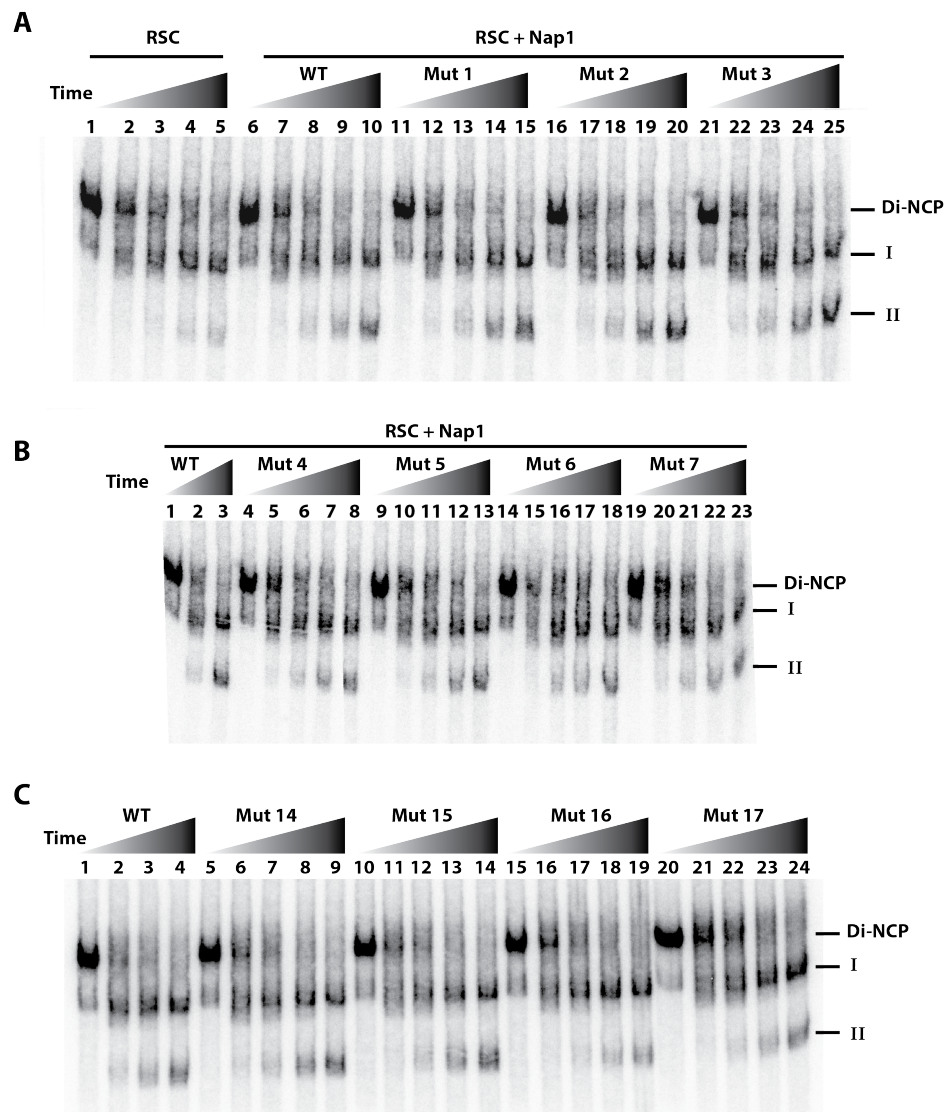

Figure S3 Many but not all of the Nap1 mutants do not affect dinucleosome disassembly by RSC.

Remodeling time course experiments with RSC and Nap1 mutants were analyzed by gel shift assays as shown here and the data plotted in Figure 6. The Nap1 mutants shown here are (A) mutants 1-3; (B) mutants 4-7; and (C) mutants 14-17.

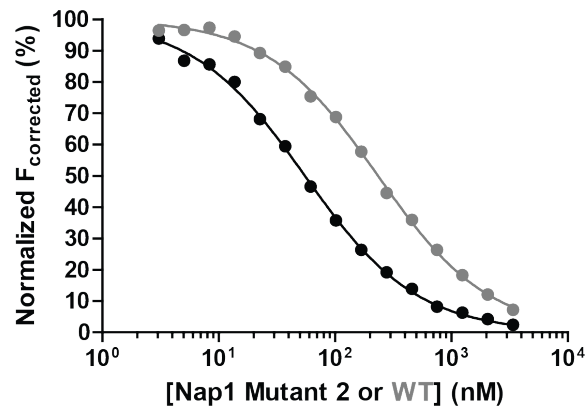

Figure S4. The Nap1 mutant 2 has a higher affinity for H2A-H2B than does wild type Nap1.

The affinity of Nap1 was measured by FRET between residue 118 of H2B (10 nM 488H2A-H2BT118C) and a site on Nap1 (50 nM 647NNap) and competing with unlabeled Nap1 WT (grey) or Mutant 2 (black). Each curve is representative of at least two independent experiments and each data point is the mean of duplicate measurements within a replicate. Errors bars are plus/minus one standard error of the mean and are too small to be visible. All fits have  $R^2 \geq 0.99$ .

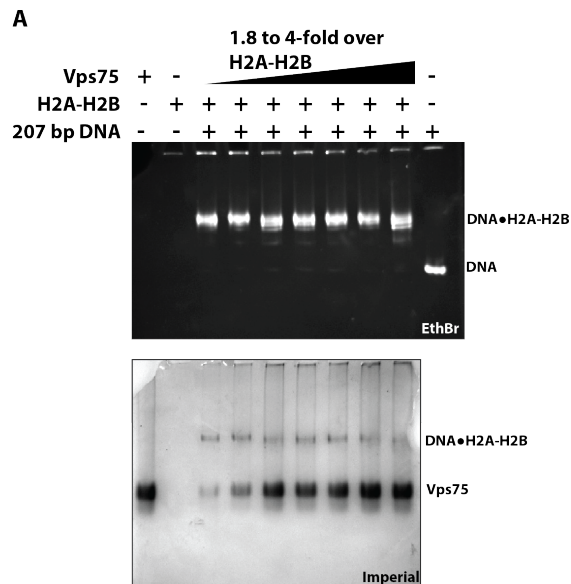

Figure S5. Vps75 does not compete for H2A-H2B binding to DNA.

The ability of the histone chaperone to compete H2A-H2B from DNA was determined using a native gel shift competition assay where Vps75 is titrated against H2A-H2B•207 bp 601 DNA. H2A-H2B and 207 bp 601 DNA are held constant at a ratio of 7.5:1 in 20 mM Tris pH 7.5, 5 mM DTT, 200 mM NaCl. H2A-H2B•DNA and free DNA are visualized by staining with EthBr (top), and protein is visualized by staining with Imperial (bottom). In the same assay, Nap1 is able to compete H2A-H2B off the DNA (For Nap1 data, see D’Arcy et al.)

## Tables

| Mutant | Mutations                                                                        | Location                              | H2A-H2B Binding compared to WT                | REF          |
|--------|----------------------------------------------------------------------------------|---------------------------------------|-----------------------------------------------|--------------|
| 1      | <del>C200A, C249A, C272A</del>                                                   | Cysteine mutant background            | Same                                          | <del>1</del> |
| 2      | Q71A, D72A, S76A, Q80A<br>C200, 249, 272A                                        | Short helix before dimerization helix | Tighter                                       | <del>1</del> |
| 3      | F113A, Q114A, M117A, E121A<br>C200, 249, 272A                                    | Underside of dimerization helix       | Same, but region changes upon H2A-H2B binding | <del>1</del> |
| 4      | K123A, K127A, E133A, Q134A, R137A<br>C200, 249, 272A                             | Top of dimerization helix             | Same, but region changes upon H2A-H2B binding | <sup>1</sup> |
| 5      | P130A<br>C200, 249, 272A                                                         | Kink in dimerization helix            | Same, but region changes upon H2A-H2B binding | <sup>1</sup> |
| 6      | P130G<br>C200, 249, 272A                                                         | Kink in dimerization helix            | Same, but region changes upon H2A-H2B binding | <sup>1</sup> |
| 7      | V115A, E116A, E119A, N122A, K123A, Q126A, K129A, E133A, R137A<br>C200, 249, 272A | Dimerization helix                    | Same, but region changes upon H2A-H2B binding | <sup>1</sup> |
| 8      | V115A, E116A, E119A, N122A, K123A<br>C200, 249, 272A                             | Dimerization helix (Beginning)        | Same, but region changes upon H2A-H2B         | <sup>1</sup> |

Blaine Bartholomew 5/7/2016 1:02 PM

**Deleted:** C200, 249, 272A

Blaine Bartholomew 5/7/2016 1:01 PM

**Deleted:** D’Arcy 2013

Blaine Bartholomew 5/7/2016 1:01 PM

**Deleted:** D’Arcy 2013

Blaine Bartholomew 5/7/2016 1:01 PM

**Deleted:** D’Arcy 2013

|           |                                                                    |                                      |                                               |                                 |
|-----------|--------------------------------------------------------------------|--------------------------------------|-----------------------------------------------|---------------------------------|
|           |                                                                    |                                      | binding                                       |                                 |
| 9         | Q126A, K129A, E133A, R137A<br>C200, 249, 272A                      | Dimerization helix (End)             | Same, but region changes upon H2A-H2B binding | <sup>1</sup>                    |
| 10        | V115A, E119A, N122A, Q126A, K129A, E133A, R137A<br>C200, 249, 272A | Dimerization helix (All)             | Same, but region changes upon H2A-H2B binding | <sup>1</sup>                    |
| 11        | Q142A, Q144A, E148A, K152A, E155A, E158A<br>C200, 249, 272A        | Loop and helix of accessory domain   | Same                                          | <sup>1</sup>                    |
| 12        | E162A, E164A, D168S, E169A, E170G, E171S, K172A<br>C200, 249, 272A | Disordered loop/quasi helix          | Same                                          | <sup>1</sup>                    |
| 13        | D176A, E178G, E179G, E180S, K183A<br>C200, 249, 272A               | Disordered loop                      | Same                                          | <sup>1</sup>                    |
| 14        | K230A, R234A<br>C200, 249, 272A                                    | Beta-sheet – second strand           | Same                                          | <sup>1</sup>                    |
| 15        | H268A, E270A<br>C200, 249, 272A                                    | Beta-sheet – fourth strand           | Same                                          | <sup>1</sup>                    |
| 16        | E310A, N314A, D317A<br>C200, 249, 272A                             | <sub>310</sub> helix                 | Same                                          | <sup>1</sup>                    |
| 17        | K320S, E324S, D325A, D327S, E328G, E329A<br>C200, 249, 272A        | Extended loop not conserved in Vps75 | Same                                          | <sup>1</sup>                    |
| 18        | E331A, E332A, D333A, E335A, E336A, R337A<br>C200, 249, 272A        | Inside helix                         | Same                                          | <sup>1</sup>                    |
| <u>19</u> | S343A, E346A, Q347A, K349A, D350A, K351A, R355A<br>C200, 249, 272A | Removes side-chains on alpha helix 6 | Reduced 50-60-fold                            | <sup>1</sup>                    |
| <u>20</u> | W359A, L352A<br>C200, 249, 272A                                    | Abolishes hydrophobic ‘knuckle’      | Reduced 50-60-fold                            | <sup>1</sup>                    |
| <u>21</u> | Includes 74-417                                                    | No N-terminal tail                   | Slightly reduced                              | <sup>2</sup>                    |
| <u>22</u> | Includes 1-365                                                     | No C-terminal tail                   | Slightly reduced                              | <sup>2</sup>                    |
| <u>23</u> | ΔE288-K305                                                         | No β-hairpin                         | Same and unable to form Nap1 tetramer         | Data not shown and <sup>3</sup> |
| <u>24</u> | 181-417                                                            | No N-terminal                        | Reduced and                                   | Data not                        |

Blaine Bartholomew 5/6/2016 4:44 PM

Deleted: 19

... [1]

Blaine Bartholomew 5/6/2016 4:45 PM

Deleted: 1

Blaine Bartholomew 5/6/2016 4:45 PM

Deleted: 2

Blaine Bartholomew 5/6/2016 4:45 PM

Deleted: 3

Blaine Bartholomew 5/6/2016 4:45 PM

Deleted: 4

Blaine Bartholomew 5/6/2016 4:45 PM

Deleted: 5

|  |  | tail<br>&dimerization<br>helix | unable to form<br>Nap1 dimer | shown |
|--|--|--------------------------------|------------------------------|-------|
|--|--|--------------------------------|------------------------------|-------|

Table S1. List of mutations in Nap1 and their properties

#### References

- 1 D'Arcy, S. *et al.* Chaperone Nap1 shields histone surfaces used in a nucleosome and can put H2A-H2B in an unconventional tetrameric form. *Mol Cell* **51**, 662-677, doi:10.1016/j.molcel.2013.07.015 (2013).
- 2 Hieb, A. R., D'Arcy, S., Kramer, M. A., White, A. E. & Luger, K. Fluorescence strategies for high-throughput quantification of protein interactions. *Nucleic Acids Res* **40**, e33, doi:10.1093/nar/gkr1045 (2012).
- 3 Park, Y. J., McBryant, S. J. & Luger, K. A beta-hairpin comprising the nuclear localization sequence sustains the self-associated states of nucleosome assembly protein 1. *J Mol Biol* **375**, 1076-1085, doi:10.1016/j.jmb.2007.11.031 (2008).
